# Supplementary material for: Efficient Triazine Derivatives for Collagenous Materials Stabilization
Source: MDPI journal article supplement (doi:10.3390/ma14113069), 2021-06-04
Supplement: s1 [file s1]

# Efficient triazine derivatives for collagenous materials stabilization

Vanessa Gatto <sup>1,2</sup>, Silvia Conca <sup>1</sup>, Noemi Bardella <sup>1</sup>, Valentina Beghetto <sup>1,2\*</sup>

<sup>1</sup> Department of Molecular Sciences and Nanosystems, University Ca' Foscari of Venice, Via Torino 155, 30172 Mestre (VE), ITALY; vanessa.gatto@unive.it, silvia.conca@unive.it, noemi.bardella@unive.it, beghetto@unive.it

<sup>2</sup> Crossing S.r.l., Viale della Repubblica 193/b, 31100 Treviso (TV), ITALY; vanessa.gatto@crossing-srl.com, valentina.beghetto@crossing-srl.com

\* Correspondence: beghetto@unive.it

Received: date; Accepted: date; Published: date

## Table of Contents

### I. DET-MM (ClO<sub>4</sub>) characterization (pages 2-3)

Figure S1. <sup>1</sup>H NMR spectrum of DETMM(ClO<sub>4</sub>).

Figure S2. <sup>13</sup>C NMR spectrum of DETMM(ClO<sub>4</sub>).

Figure S3. FT-IR spectrum of DETMM(ClO<sub>4</sub>).

### II. DET-MM (BF<sub>4</sub>) characterization (pages 4-5)

Figure S4. <sup>1</sup>H NMR spectrum of DETMM(BF<sub>4</sub>).

Figure S5. <sup>13</sup>C NMR spectrum of DETMM(BF<sub>4</sub>).

Figure S6. FT-IR spectrum of DETMM(BF<sub>4</sub>).

### III. DSC analysis of calf collagen and leather samples (pages 6-7)

**I. DETMM(ClO<sub>4</sub>) characterization**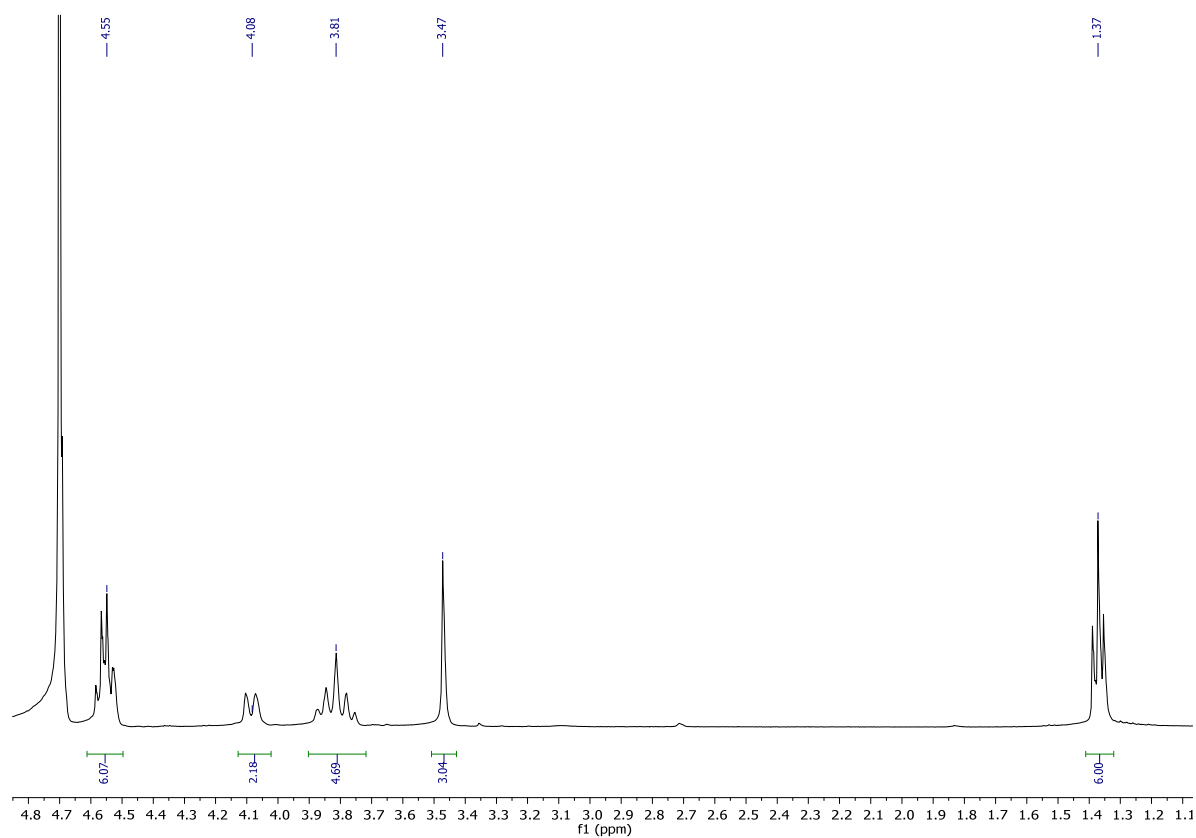**Figure S1.** <sup>1</sup>H NMR spectrum of DETMM(ClO<sub>4</sub>) in D<sub>2</sub>O.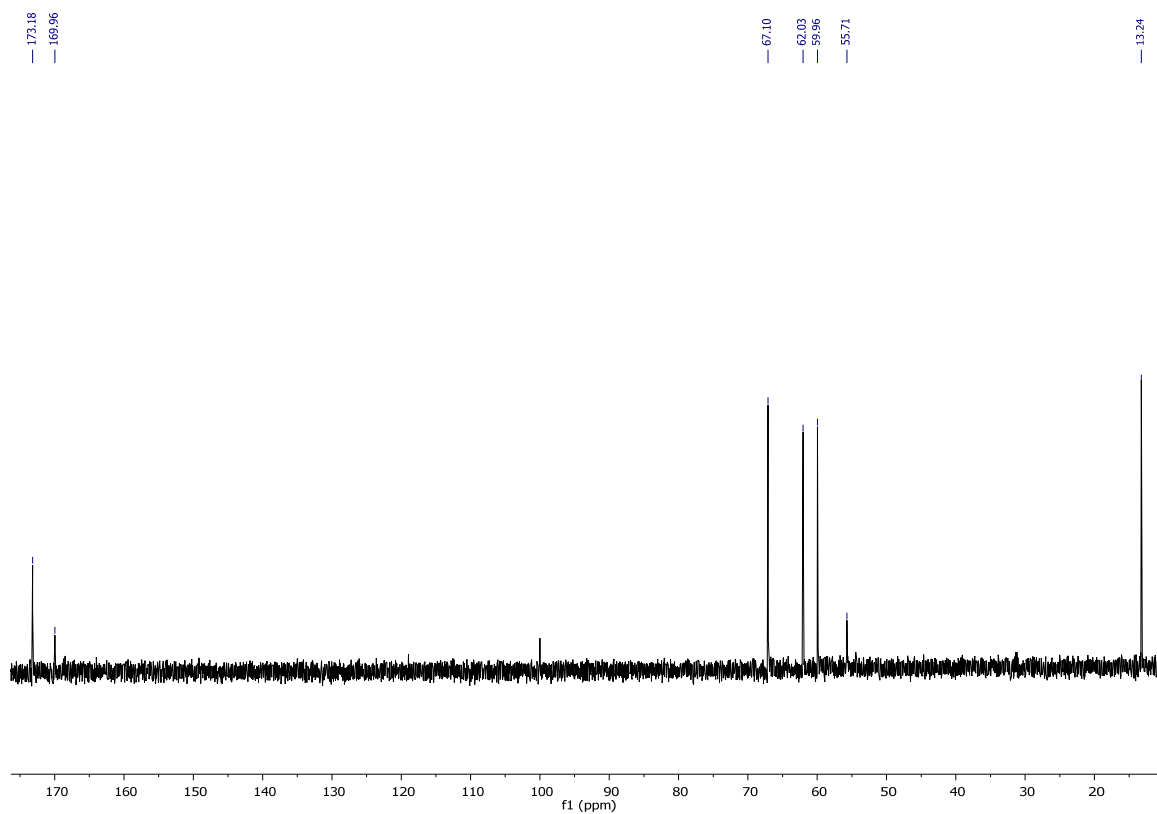**Figure S2.** <sup>13</sup>C NMR spectrum of DETMM(ClO<sub>4</sub>) in D<sub>2</sub>O.

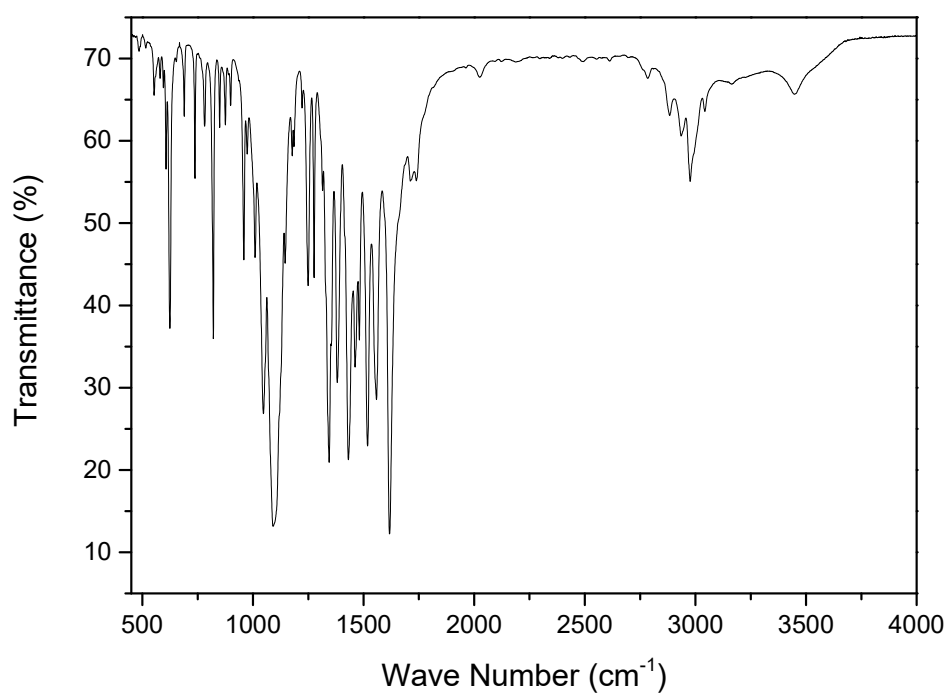

**Figure S3.** FT-IR spectrum of DETMM(ClO<sub>4</sub>) in KBr.

## II. DETMM(BF<sub>4</sub>) characterization

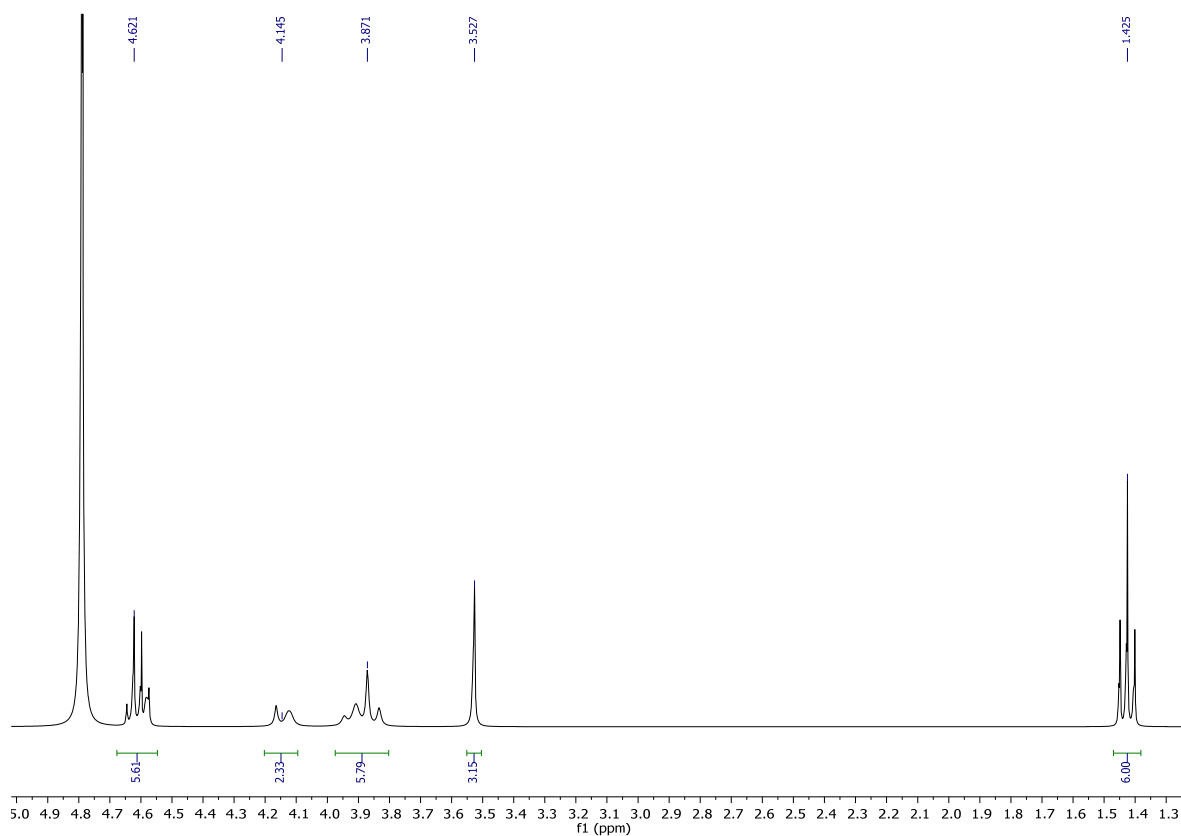

Figure S4. <sup>1</sup>H NMR spectrum of DETMM(BF<sub>4</sub>) in D<sub>2</sub>O.

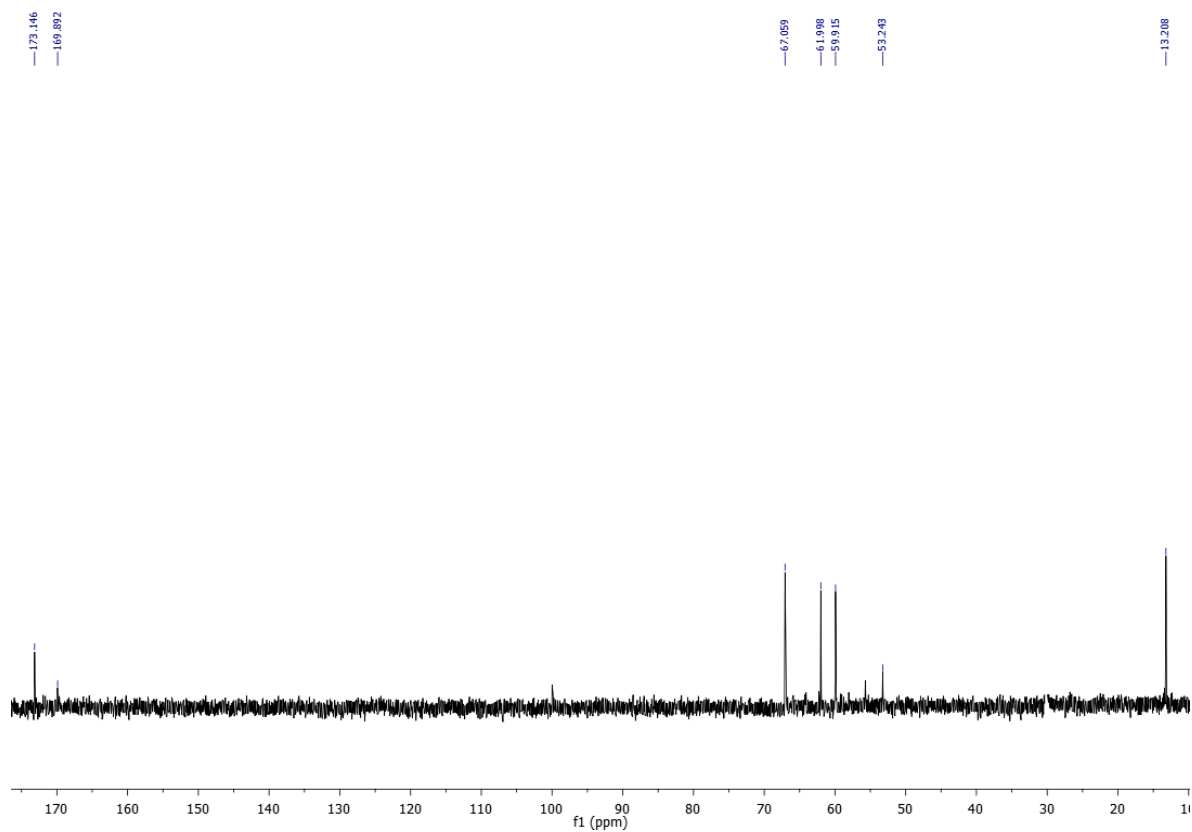

Figure S5. <sup>13</sup>C NMR spectrum of DETMM(BF<sub>4</sub>) in D<sub>2</sub>O.

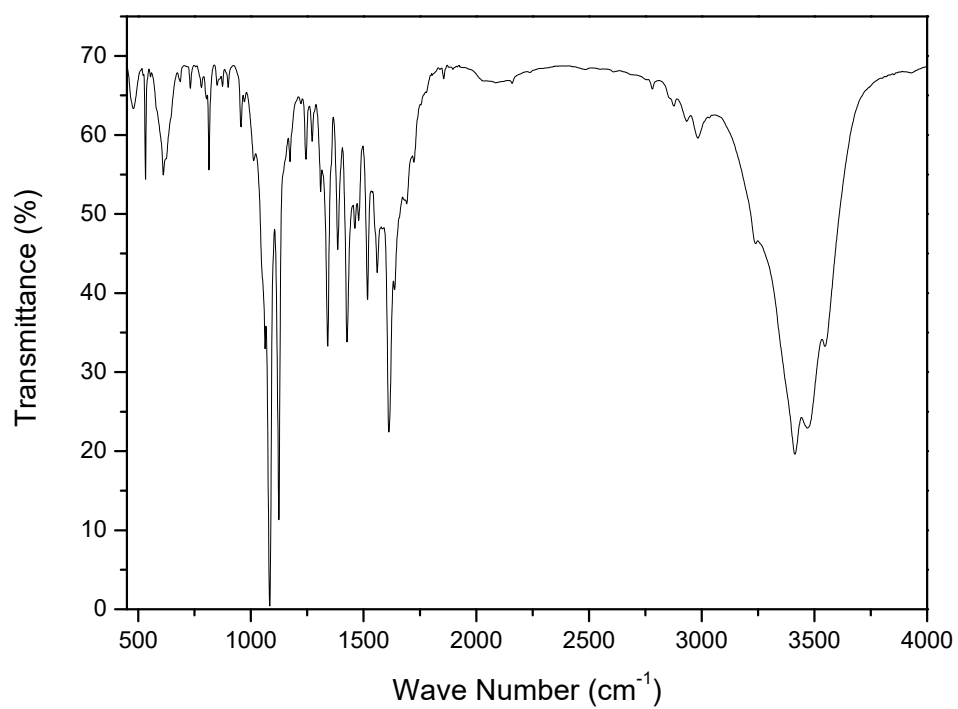

**Figure S6.** FT-IR spectrum of DETMM(BF<sub>4</sub>) in KBr.

### III. DSC analysis of calf collagen and leather samples

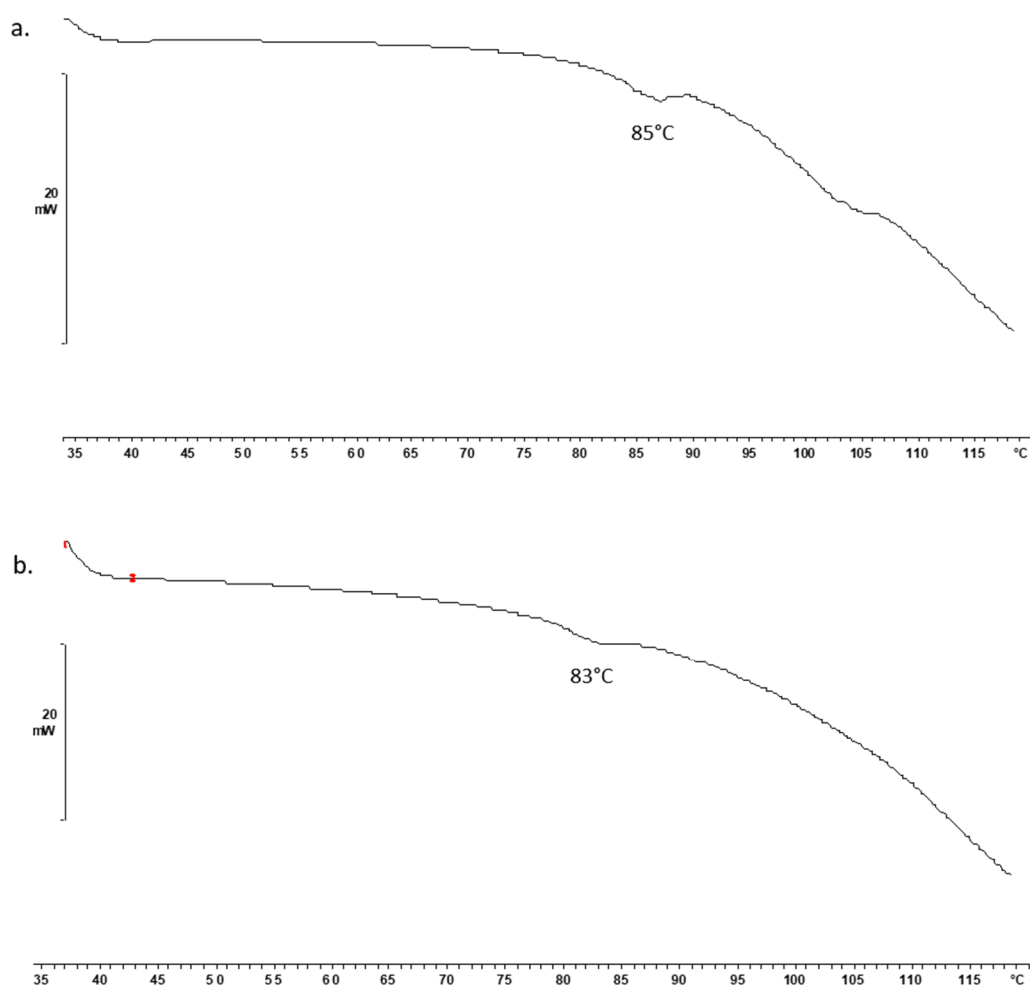

**Figure S7.** DSC spectra of collagen cross-linking by a. CDET/NMM system and b. CDET/MPD system.
